# Supplementary material for: Chromobox 3 Assembles a Novel Epigenetic Complex Contributing to Cystathionine γ-lyase–mediated Protection Against Aortic Aneurysm/dissection
Source: Research Square preprint supplement (doi:10.21203/rs.3.rs-7423522/v1), 2025-09-03
Supplement: Supplementary file 1 [file c1839b5817a77a8b12bc8081.xlsx]

## Sheet: Sheet1
Supplemental Table 2. Sequences of the primers used for real-time PCR
human CSE	Forward	CACTGTCGTGTCGCTGTTTG	Reverse	CTAGCGCGATGGTCATGAGT
human GAPDH	Forward	AATGGGCAGCCGTTAGGAAA	Reverse	GCGCCCAATACGACCAAATC
mouse Cse	Forward	GCCCAGGGATGGTCAGTTTC	Reverse	TCTGCCAGAGTAAACAGCTTTAGAT
mouse Cbx1	Forward	CCAAGGAAGCCAATGTCAAGT	Reverse	GGAATGCCACGTTAGCCTTTC
mouse Cbx2	Forward	GGCTGGTCCTCCAAACACAA	Reverse	CCCTGGGTCTCTTGCCTCT
mouse Cbx3	Forward	AGTACCAGCGACCTGGCAT	Reverse	AAGCAGGCGTTTTCGGAATG
mouse Cbx4	Forward	AAGAAGCGGATACGCAAGGG	Reverse	GGAGGAGTCTTGAAGCCCAG
mouse Cbx5	Forward	GACAGGCGCATGGTTAAGG	Reverse	CCTGGGCTTATTGTTTTCACCC
mouse Cbx6	Forward	GTCAGTTCTACCCTTGGGTTCC	Reverse	TGACCAGGTGCCTATTTTTGC
mouse Cbx7	Forward	TGCGGAAGGGCAAAGTTGAAT	Reverse	ACAAGGCGAGGGTCCAAGA
mouse Cbx8	Forward	ATTCGCAAAGGACGCATGGAA	Reverse	CCTCGCTTTTTGGGGCCATA
mouse Pcgf1	Forward	AGATGGACCCACTACGGAAC	Reverse	GCTGCGTCTCGTGGATCTT
mouse Pcgf2	Forward	CGGACCACACGGATTAAAATCA	Reverse	CGATGCAGGTTTTGCAGAAGG
mouse Pcgf3	Forward	TGACGAGCAGGTGAACACAC	Reverse	GTACGCAAACACGGGATAAACT
mouse Pcgf4	Forward	ATCCCCACTTAATGTGTGTCCT	Reverse	CTTGCTGGTCTCCAAGTAACG
mouse Pcgf5	Forward	GTAAGACCTGTATTGTCCAGCAC	Reverse	TCTCGTAGTCCAGGCACTAATTT
mouse Pcgf6	Forward	GAGGAGCGCCTGATAAACCTT	Reverse	TGGTGGACAACTATGTTGCATT
mouse Ring1b	Forward	GAGTTACAACGAACACCTCAGG	Reverse	CAATCCGCGCAAAACCGATG
mouse Ring1a	Forward	GATGGTACAGAGATTGCGGTTT	Reverse	CCTATGCAGGCACTCCTTGG
mouse Rybp	Forward	CGACCAGGCCAAAAAGACAAG	Reverse	CACATCGCAGATGCTGCATT
mouse Suz12	Forward	AACTCGAAATCTTATCGCACCAA	Reverse	TGCAAATGTGCAGACAAGCTAT
mouse Ezh2	Forward	TGCCTCCTGAATGTACTCCAA	Reverse	AGGGATGTAGGAAGCAGTCATAC
mouse Ezh1	Forward	CCAGACTGCCAGAATCGCTTT	Reverse	CAGGTGCTTTTTGAGGCCA
mouse Eed	Forward	ATGCTGTCAGTATTGAGAGTGGC	Reverse	GAGGCTGTTCACACATTTGAAAG
mouse Adamts3	Forward	GCTGGTACTGACGAAATGGTG	Reverse	ATGACACGTCCCTGGGTGA
mouse Adamts4	Forward	ATGGCCTCAATCCATCCCAG	Reverse	AAGCAGGGTTGGAATCTTTGC
mouse Adam9	Forward	GGAAGGCTCCCTACTCTCTGA	Reverse	TCCAAAACTGGCATTCTCCAAA
mouse Adam10	Forward	ATGGTGTTGCCGACAGTGTTA	Reverse	GTTTGGCACGCTGGTGTTTTT
mouse Mmp2	Forward	CAAGTTCCCCGGCGATGTC	Reverse	TTCTGGTCAAGGTCACCTGTC
mouse Mmp3	Forward	ACATGGAGACTTTGTCCCTTTTG	Reverse	TTGGCTGAGTGGTAGAGTCCC
mouse Mmp9	Forward	CTGGACAGCCAGACACTAAAG	Reverse	CTCGCGGCAAGTCTTCAGAG
mouse Mmp10	Forward	GAGCCACTAGCCATCCTGG	Reverse	CTGAGCAAGATCCATGCTTGG
mouse Mmp13	Forward	CTTCTTCTTGTTGAGCTGGACTC	Reverse	CTGTGGAGGTCACTGTAGACT
mouse Col1a2	Forward	GTAACTTCGTGCCTAGCAACA	Reverse	CCTTTGTCAGAATACTGAGCAGC
mouse Nlrp3	Forward	ATTACCCGCCCGAGAAAGG	Reverse	TCGCAGCAAAGATCCACACAG
mouse Bcl2	Forward	ATGCCTTTGTGGAACTATATGGC	Reverse	GGTATGCACCCAGAGTGATGC
mouse Gapdh	Forward	AGGTCGGTGTGAACGGATTTG	Reverse	TGTAGACCATGTAGTTGAGGTCA
