# Supplementary material for: Chromobox 3 Assembles a Novel Epigenetic Complex Contributing to Cystathionine γ-lyase–mediated Protection Against Aortic Aneurysm/dissection
Source: Research Square preprint supplement (doi:10.21203/rs.3.rs-7423522/v1), 2025-09-03
Supplement: Supplementary file 2 [file c5e16644de76ebff4e222756.xlsx]

## Sheet: Sheet1
Supplemental Table 1: List of patients' information used as source of human aortic tissues (N/A= not available)
Sample #	Sex	Age (y)	Race	Description	Medication usage
1	Male	63	Asian	Aortic Disease, Aortic Aneurysm	antihypertensive drugs (β-Adrengergic Blocking Agents)
2	Female	69	Asian	Aortic Disease, Aortic Aneurysm	antihypertensive drugs (Diuretics, β-Adrengergic Blocking Agents)
3	Male	70	Asian	Aortic Disease, Aortic Aneurysm	antihypertensive drugs (Angiotensin-Converting Enzyme Inhibitors, β-Adrengergic Blocking Agents), antiplatelet Agent
4	Female	52	Asian	Aortic Disease, Aortic Aneurysm	antihypertensive drugs (Angiotensin-Converting Enzyme Inhibitors), antiplatelet Agent
5	Male	52	Asian	Aortic Disease, Aortic Aneurysm	antihypertensive drugs (β-Adrengergic Blocking Agents), antiplatelet Agent
6	Female	36	Asian	Aortic Disease, Aortic Aneurysm	N/A
7	Male	33	Asian	Aortic Disease, Aortic Aneurysm	N/A
8	Female	43	Asian	Aortic Disease, Aortic Aneurysm	antihypertensive drugs (Calcium Channel Blockers), antiplatelet Agent
9	Male	65	Asian	Aortic Disease, Aortic Aneurysm	N/A
10	Male	28	Asian	Aortic Disease, Aortic Aneurysm	N/A
11	Male	51	Asian	Aortic Disease, Aortic Aneurysm	antihyperlipidemic Agents (Statins, Fibric Acid Derivatives), antihypertensive drugs (Calcium Channel Blockers)
12	Male	41	Asian	Aortic Disease, Aortic Aneurysm	antihypertensive drugs (Angiotensin-Converting Enzyme Inhibitors, β-Adrengergic Blocking Agents)
13	Male	57	Asian	Aortic Disease, Aortic Aneurysm	antihypertensive drugs (Angiotensin-Converting Enzyme Inhibitors, Diuretics, β-Adrengergic Blocking Agents)
14	Female	41	Asian	Aortic Disease, Aortic Aneurysm	N/A
15	Male	49	Asian	Aortic Disease, Aortic Aneurysm	N/A
16	Female	47	Asian	Abdominal Aorta from organ donor	N/A
17	Female	38	Asian	Abdominal Aorta from organ donor	N/A
18	Female	52	Asian	Abdominal Aorta from organ donor	antihypertensive drugs (Angiotensin-Converting Enzyme Inhibitors), antiplatelet Agent
19	Male	52	Asian	Abdominal Aorta from organ donor	antihypertensive drugs (β-Adrengergic Blocking Agents), antiplatelet Agent
20	Female	68	Asian	Abdominal Aorta from organ donor	N/A
21	Female	50	Asian	Abdominal Aorta from organ donor	N/A
22	Male	52	Asian	Abdominal Aorta from organ donor	N/A
23	male	41	Asian	Abdominal Aorta from organ donor	antihypertensive drugs (Angiotensin-Converting Enzyme Inhibitors, β-Adrengergic Blocking Agents)
24	male	63	Asian	Abdominal Aorta from organ donor	antihypertensive drugs (β-Adrengergic Blocking Agents)
25	male	70	Asian	Abdominal Aorta from organ donor	antihypertensive drugs (Angiotensin-Converting Enzyme Inhibitors, β-Adrengergic Blocking Agents), antiplatelet Agent
