# Supplementary material for: Chromobox 3 Assembles a Novel Epigenetic Complex Contributing to Cystathionine γ-lyase–mediated Protection Against Aortic Aneurysm/dissection
Source: Research Square preprint supplement (doi:10.21203/rs.3.rs-7423522/v1), 2025-09-03
Supplement: Supplementary file 3 [file d3510cef2e72c8b89904d3d9.xlsx]

## Sheet: proteinGroups
Gene names	Sequence coverage [%]	Mol. weight [kDa]
Wdr46	6.2	55.581
Ring1	3.4	42.612
Igkv10	13.9	12.576
Igkv	14	12.579
Lyz1	8.1	16.794
Dhx9	1.8	149.62
Farsb	14.3	7.0008
Nop58	10.8	23.833
Bzw1	7.5	17.082
Sptbn1	4.2	56.537
Kel	3.5	32.478
Adrm1	3.4	48.531
Ubc	30.7	82.549
Vim	33	49.192
Traf3ip3	7.5	16.917
Hpn	21.9	3.4419
Pdlim5	20.9	26.66
Fxr1	5.5	63.915
Rpl9	14.1	21.622
Fubp1	22.6	54.844
Dhx15	3.8	68.578
Dclk1	11.7	12.942
Caln1	14.5	8.4942
Gsn	6.6	18.739
Maea	8.2	16.707
Eif4a3	19.2	46.854
Slc9a3r2	2.8	35.299
Cmas	16	48.029
Thoc5	11.4	78.699
Spag9	1.5	72.918
Eef1d	9.3	14.182
Dbn1	13.2	72.416
Tmem33	9.5	14.049
Suds3	2.4	38.801
Hnrnpr	7.4	69.632
Dock7	6.5	26.952
Olfr824	2.2	35.614
Psmc4	12.6	24.436
Eif3k	20.8	6.088
Ilk	3.4	25.844
Rnh1	7.5	21.735
Rab11fip1	0.7	125.02
Svil	6.3	63.353
Rpl18	32.3	17.958
Numa1	6.8	23.567
Nfib	6.3	20.725
Pls3	3.3	70.642
Senp8	8.5	26.661
Rpl14	19	6.8838
Psmc5	8.5	34.165
Ddx39b	13.5	54.642
Mia2	1.3	79.394
Esr1	3.5	41.069
Bzw2	4.5	22.78
Gdi2	10.6	11.441
Ifi205a	2.7	49.499
Nolc1	33.3	3.8694
Tmed9	13.2	17.787
Thoc7	26.6	19.921
Tkt	4	53.879
Rps24	10.2	13.605
Rbmxl1	13.1	42.178
Pcbp2	13.5	10.395
Triobp	25.4	71.684
Wtap	16.2	9.5297
Heatr5b	2.2	70.724
Hars	5.8	15.27
Nars	2.2	57.222
Actr1a	12.5	42.613
Ahnak	20.3	33.053
Tgm7	1.1	79.503
Mybbp1a	1.1	82.41
Lmo7	11	130.7
Actn1	18.3	102.72
Hspa1b	15.8	70.078
Krt78	4.3	54.764
Ddx5	32.8	69.265
Polr1c	10.6	19.379
Mmp10	1.5	53.91
Krt10	12.1	57.04
Rpl19	8.2	23.247
Srp68	3.4	65.952
Suv39h1	10.7	47.767
Rpn2	15.3	66.301
Rbbp7	25.2	46.908
Psmc3	2.8	39.145
Rnf20	2	70.389
Rpl10	19.4	23.072
Mpp1	2.7	50.535
Myef2	1.5	57.033
Set	6.6	17.584
Psip1	3.1	29.372
Coro1b	18.4	53.912
Snrnp70	16.9	29.421
Celf2	6.9	17.665
Sptan1	2.9	282.89
Hbat1	20.7	6.2159
Krt15	11.5	49.137
Psmd12	2.6	48.328
Aifm1	2.5	66.113
Thoc2	10.4	46.462
Prdx4	8.3	26.391
Dnajc6	1.8	57.933
Rpsa	33.6	32.85
Hnrnpk	28.3	50.976
Actb	74.1	41.736
Twistnb	2.7	36.721
Psmd13	12	39.694
Krt2	8.2	70.922
Eif4b	4.4	40.696
Cgnl1	1	139.89
Flna	14.7	280.5
Ddx3x	19.7	73.013
9330182L06Rik	5	26.778
Pogz	1.1	144.86
Ablim1	9.5	96.804
4921501E09Rik	1.2	102.12
Cep162	0.7	160.88
Rnf181	3.9	23.02
Acsm1	6.3	19.984
Pbk	5.8	13.425
Dek	4.5	23.078
1700026D08Rik	3.9	29.338
Ruvbl1	16.4	14.513
Rabgef1	3.6	25.937
Asap2	1.4	61.746
Fam111a	1.2	64.738
Rps5	12.6	20.413
Myo5a	1.3	212.33
Cops3	11.3	11.465
Aldh18a1	4.6	19.141
Ston1	5.5	23.596
Lyar	10.7	14.956
Fip1l1	1.6	46.449
Mapk3	3.9	42.401
Eif2b2	8.3	25.369
Far1	18.2	20.67
Atp5a1	23.9	54.594
Tpm3	13.8	28.723
Fmr1	2.5	66.269
Gls	4.7	25.893
Farsa	10.5	11.184
Filip1l	1.2	101.92
Mtdh	16.5	18.215
Tead1	3.4	40.001
Mki67	1.1	350.86
Ephx1	4.9	27.929
Cenpf	1.2	110.04
Katna1	3.4	56.215
Cct3	11	56.526
Hsp90ab1	7.9	22.482
Synpo	1.2	117.51
Tpm1	18.1	28.556
Actb	81.9	29.442
Rbm39	10.9	33.828
Cald1	33.2	61.836
Tmprss13	1.5	60.344
Fus;Taf15	10.8	13.897
Lancl2	2.3	49.742
Ssb	4.8	26.162
Srrm1	6.4	16.242
Papolg	3.9	27.588
H2-T3	30.9	6.9797
Smarcb1	23.6	6.0395
Kdm2a	1	132.67
Zbtb48	14	18.239
Ppfibp1	3.3	27.973
Pspc1	18.6	6.7765
Pdia6	3.9	48.132
Anxa6	3.4	62.29
1700037H04Rik	11.3	15.773
Calu	5.7	16.49
Pabpn1	8.5	34.003
Flot1	3.4	42.238
Adam29	10.1	27.636
Hdac3	8	27.362
Sclt1	7.6	23.559
Lrrfip1	5.4	42.471
Phf14	3.4	41.222
Hnrnpl	14	66.821
Cpsf6	4	59.308
Atad3a	5	24.807
Myh14	2.6	228.58
Igh	12.9	11.23
Hdac1	4.1	55.074
Ptgis	1.8	57.769
Hnrnph1	20.3	49.199
Ptrf	10.2	43.953
Ddost	6.3	48.985
Dapk3	2.9	51.421
Smarce1	9.2	46.638
Gtf2h4	17.9	52.224
Wdr1	3.8	63.42
Actb	72.1	15.209
Krt1	6.4	65.605
Tuba1b	32.8	50.151
Alb	5.6	68.692
Ncl	16	76.711
Pgk1	18	44.55
Eef1a1	38.1	50.113
Rpl7a	6.3	23.195
Hist1h1c	9.4	21.266
Eno1	23.5	47.14
Ptbp1	11.2	59.321
Slc2a1	2	54.07
Rpl13a	30	23.464
Serpinh1	38.6	46.51
Hspa5	8.1	56.892
Cbx3	19.1	20.811
Mcm3	1.1	91.544
Msn	8	67.766
U2af2	2.6	33.77
Glud1	8	35.823
Rpl3	32.3	46.079
Atxn10	2.6	48.244
Pabpc1	4.6	58.48
Wars	3.4	53.625
Ranbp1	5.4	23.497
Fbl	2.4	34.375
Prdx1	40.7	22.144
Hspa9	11.3	73.46
Fen1	2.1	42.3
Psmc2	12.9	48.677
Rpl13	38.4	24.305
Lmna	21.5	74.237
Krt6a	15.2	59.334
Pa2g4	24.5	41.508
Kpna2	10.6	57.927
Ddx6	10.8	54.191
Atp5b	20.8	56.3
Eef2	7.6	95.313
Gulo	2.7	47.282
Eif5	8	32.7
Eif3e	4.3	49.567
Eif4a1	30.5	41.49
Actr2	27.3	37.322
Abce1	6.3	64.505
Rps8	24.5	24.263
Psmc6	16.7	33.053
Acta2	70.6	42.009
Ran	34.3	24.351
Ybx1	32.3	35.7
Hspa8	33.9	70.87
Tpt1	8.1	19.462
Dnaja1	3.3	44.868
Gnas	1.9	121.5
Kcnj1	3.6	21.808
Actg1	74.1	41.792
Tuba1a	29.9	50.135
Tubb4b	29.7	49.83
Slc9a3r1	15.2	38.6
Vasp	2.4	39.666
Cct2	2.2	57.477
Cbx1	15.1	21.418
Ap2m1	12.9	49.389
Srsf3	18.5	14.203
Rps3a1	6.4	29.885
Mprip	8	257.28
G3bp1	2.3	43.516
Tubb5	32.7	49.67
Hmmr	2	96.67
Top2a	14.7	172.79
Aqp1	5.9	28.792
Kcnq3	1.6	96.596
Scel	28.3	70.819
Ehd4	5.8	37.246
Hnrnpab	16.7	29.922
Acsbg2	1.8	74.318
Krt5	18.3	61.766
Ddx39	15.7	49.083
Npm3	9.1	19.053
Nle1	3.1	53.177
Etf1	11.4	43.571
Actl6a	5.4	47.447
Dars	18.2	57.145
Tmod3	50.9	39.472
Dnaja2	1.7	45.746
Eif4h	13.2	25.186
Fgb	3.1	54.752
Actr3	31.1	47.357
Hnrnpm	14.9	73.769
Kars	1.5	67.883
Serpinb9b	2.4	42.733
Pdlim7	17.1	50.118
Gnl3	8	60.786
Eif2s3x	27.8	51.105
Ppp2r2a	9.8	42.605
Dctn2	21.1	44.116
Khdrbs2	100	1.9304
Gnb5	20.5	8.2642
Atrx	1	105.3
Hnrnpu	12.4	87.977
Srsf6	15.9	39.025
Ruvbl2	13.4	51.143
Sec31b	0.9	125.63
Ddx3y	16.9	73.384
Ifit1	14.3	53.738
Pigs	2.5	61.597
Rbm14	3.6	66.125
Rcc1	8.5	46.374
Hnrnpc	6.6	36.905
Ddx17	21.6	72.584
Tmpo	21	50.358
Rpl15	21.6	24.146
Poldip3	18.3	46.231
Eif3f	17.6	16.146
Rars	2.5	45.919
Actb	65.1	41.768
Flot2	5.6	47.008
Fgg	4.7	50.349
Parva	8.9	38.361
Myh10	15.6	233.45
Eif2s2	22.1	38.092
Parp3	6.6	59.948
Lamb2	0.5	150.82
Nop56	11.3	58.175
Cyp1b1	2.5	54.158
Krt76	7.4	62.844
Psmd11	8.3	47.436
Pak1ip1	12	41.058
Ilf2	12.1	43.01
Adnp	3.5	122.15
Eef1g	20.4	50.06
Wdr18	3.3	36.595
Ddx47	12.5	50.638
Tardbp	14.7	44.547
Rpl4	26.5	47.153
Trim28	10	88.846
Smg7	0.6	126.84
Rpn1	13.8	68.396
Pes1	4.8	68.23
Myo1d	10.2	116.08
Hnrnpd	14.4	38.354
Psmb6	4.6	25.378
Khdrbs1	4.1	48.37
Rbbp4	11.1	47.655
Fscn1	13.4	54.507
Cbx5	26.7	22.186
Sdpr	7.2	46.763
Ugt1a6b	4.9	60.434
Top2b	3.9	181.91
Ybx3	25.1	31.822
Krt42	15	50.133
Actb	97.4	8.5936
Krt73	7.4	58.911
Znf280c	3.2	83.145
Smchd1	1.6	225.65
Ppp1r9b	1.2	89.519
Plec	2.7	506.45
Try10	16.3	26.221
Try5	10.2	26.531
Gtf2h2	7.6	44.703
Rpap1	10.3	11.07
Camsap3	0.7	135.17
Fam98b	8.6	45.349
Flnb	8.8	277.82
Dhx38	3	49.81
Actbl2	32.7	42.004
Ehd2	17.7	61.174
Nutm1	1.2	120.69
Fbxo28	6.2	40.977
Rcc2	2.5	55.983
Stg	3.2	36.654
Ckap4	20.2	63.691
Nxf1	3.4	70.375
Cep55	27.9	53.93
Lima1	11.6	66.017
Srrm2	0.4	294.84
Gm9951	14.7	14.354
Lsm14b	17.1	42.309
Eif3b	1	108.98
Gna13	66.7	2.1685
Plcl2	1.2	125.77
Eif3l	8	66.612
Sf3b4	5.2	44.355
Thoc1	4.7	75.435
Aspa	2.9	35.344
Cluap1	3.1	47.952
Actr1b	12.8	42.281
Myh9	34.5	226.37
Uhrf1	1.5	88.303
Krt79	7.2	57.552
Sfpq	3.3	75.441
Pawr	8.7	35.908
Cdk9	8.1	42.761
Psmd6	17.2	45.536
Klhl22	3.2	71.686
Prpf19	7.1	55.238
Cstf1	2.8	48.381
Dusp19	3.6	24.117
Arhgdia	7.8	23.407
2210010C04Rik	4.9	26.407
Rab5a	5.6	23.598
Shmt2	5.8	55.758
Cs	16.4	51.736
Tmem43	4.8	44.783
Hmg20a	9.2	39.917
Paics	8	47.006
Tubb3	21.8	50.418
Krt17	16.2	48.161
Ccnt1	1.2	80.597
Actg1	65.6	43.6
Actr10	14.6	46.207
Myo1c	22.7	121.94
Hnrnpf	21.9	45.729
